# Supplementary material
Source: publisher figshare collection journal article supplement (https://tandf.figshare.com/ndownloader/files/22567643)
Supplement: Supplementary file 1 [file 22567643]

## Appendix A: Cited Interviews

| Interview # | Position Title          | Organization                                                | Date                                            |
|-------------|-------------------------|-------------------------------------------------------------|-------------------------------------------------|
| 1           | Politician              | GGH region municipality                                     | August 20, 2014                                 |
| 2           | Manager                 | GGH region environmental organization                       | October 17, 2017                                |
| 3           | Researcher              | Technische Universität Darmstadt, Darmstadt                 | March 9, 2018 and July 18, 2019                 |
| 4           | Planner                 | Ontario Ministry of Municipal Affairs and Housing           | August 29, 2018                                 |
| 5           | Staff member            | Regionalpark Ballungsraum RheinMain GmbH, Flörsheim am Main | May 18, 2018, August 23, 2018 and July 15, 2019 |
| 6           | Former staff member     | Regionalpark Ballungsraum RheinMain GmbH, Flörsheim am Main | September 9, 2018                               |
| 7           | Community planner       | GGH region municipality                                     | November 6, 2018                                |
| 8           | Activist and farmer     | GGH region environmental organization                       | August 19, 2014                                 |
| 9           | Activist and consultant | GGH region environmental organization                       | October 22, 2014 and April 2, 2019              |
| 10          | Staff member            | GGH region farming organization                             | August 26, 2014                                 |
